# Supplementary material for: Precision of radiostereometric analysis (RSA) of acetabular cup stability and polyethylene wear improved by adding tantalum beads to the liner
Source: PubMed Central journal article supplement — Acta Orthop. 2015 Sep 4;86(5):563–8. doi: 10.3109/17453674.2015.1054255 (PMC4564778; doi:10.3109/17453674.2015.1054255), 2015-09-04
Supplement: ORT-86-563-s7515.pdf [file ORT-86-563-s7515.pdf]

## Supplementary article data

# Precision of radiostereometric analysis (RSA) of acetabular cup stability and polyethylene wear improved by adding tantalum beads to the liner

Audrey K NEBERGALL<sup>1</sup>, Kevin RADER<sup>2</sup>, Henrik PALM<sup>3</sup>, Henrik MALCHAU<sup>1</sup>, and Meridith E GREENE<sup>1</sup>

<sup>1</sup> Harris Orthopaedic Laboratory, Massachusetts General Hospital, Boston, MA; <sup>2</sup> Biostatistics Department, Harvard University, Cambridge, MA;

<sup>3</sup> Department of Orthopedics, Hvidovre University Hospital, Copenhagen, Denmark.

Correspondence: megreene@partners.org

Submitted 2014-05-16. Accepted 2015-04-01.

Table 1. The mean (SD) precision (mm), and precision interval (all calculated from double examinations) in measuring superior femoral head penetration into the polyethylene (wear) in the x-, y-, and z-planes. The precision is defined by the SD × critical value (t) and the precision interval is defined by the mean (SD) × t

| Method / Plane         | Mean (SD)      | Precision | Precision interval |
|------------------------|----------------|-----------|--------------------|
| Liner (n = 45)         |                |           |                    |
| x                      | -0.016 (0.081) | 0.163     | -0.179 to 0.148    |
| y                      | -0.015 (0.042) | 0.086     | -0.101 to 0.070    |
| z                      | 0.092 (0.284)  | 0.573     | -0.481 to 0.665    |
| Shell (n = 48)         |                |           |                    |
| x                      | -0.022 (0.120) | 0.242     | -0.264 to 0.220    |
| y                      | -0.027 (0.128) | 0.257     | -0.284 to 0.231    |
| z                      | 0.091 (0.397)  | 0.798     | -0.707 to 0.888    |
| Shell + liner (n = 50) |                |           |                    |
| x                      | 0.001 (0.058)  | 0.116     | -0.114 to 0.117    |
| y                      | -0.013 (0.057) | 0.115     | -0.128 to 0.102    |
| z                      | 0.033 (0.196)  | 0.393     | -0.360 to 0.425    |

Table 3. The mean (SD) precision (°), and precision interval (all calculated from double examinations) in measuring acetabular cup rotation in the x-, y-, and z-planes. The precision is defined by the SD × critical value (t) and the precision interval is defined by the mean (SD) × t

| Method / Plane         | Mean (SD)      | Precision | Precision interval |
|------------------------|----------------|-----------|--------------------|
| Liner (n = 44)         |                |           |                    |
| x                      | 0.013 (0.410)  | 0.826     | -0.813 to 0.838    |
| y                      | -0.095 (0.529) | 1.067     | -1.163 to 0.972    |
| z                      | 0.011 (0.170)  | 0.343     | -0.332, 0.353      |
| Shell + liner (n = 45) |                |           |                    |
| x                      | 0.061 (0.286)  | 0.579     | -0.519 to 0.640    |
| y                      | 0.008 (0.231)  | 0.467     | -0.458 to 0.475    |
| z                      | 0.004 (0.143)  | 0.289     | -0.284 to 0.292    |
